# Supplementary material for: Adsorption of Orange II Onto Zn2Al–Layered Double Hydroxide Prepared From Zinc Ash
Source: PubMed Central journal article supplement (PMC7793787; doi:10.3389/fchem.2020.573535), 2020-11-30
Supplement: Table_1.pdf [file Table_1.pdf]

## *Supplementary Material*

**Table S1.** The main characteristics of the synthesized layered double hydroxides

| <b>Parameter</b> | <b>Zn/Al<sub>calc</sub></b> | <b>unit cell<br/>parameter</b> | <b>unit cell<br/>parameter</b> | <b>S<sub>BET</sub></b>   | <b>V<sub>p</sub></b>      |
|------------------|-----------------------------|--------------------------------|--------------------------------|--------------------------|---------------------------|
| <b>Sample</b>    |                             | <b><i>a</i> (Å)</b>            | <b><i>c</i> (Å)</b>            | <b>(m<sup>2</sup>/g)</b> | <b>(cm<sup>3</sup>/g)</b> |
| LDH-R            | 2.07                        | 3.080                          | 22.79                          | 30.6                     | 0.0682                    |
| LDH-W            | 1.98                        | 3.082                          | 22.82                          | 21.8                     | 0.0573                    |

Zn/Al<sub>calc</sub> – the calculated molar ratio R after chemical analysis;  $a = 2d_{110}$ ;  $c = 3d_{003}$

**Table S2.** Kinetic parameters for the adsorption of Orange II by LDH-R and LDH-W

| Kinetic model | LDH-R                                         |            |            | LDH-W      |            |            |            |
|---------------|-----------------------------------------------|------------|------------|------------|------------|------------|------------|
|               | pH                                            | 4.3        | 6.3        | 9          | 4.3        | 6.3        | 9          |
| PFO           | $q_{e,calc}$ (mg g <sup>-1</sup> )            | 37.92      | 29.33      | 27.17      | 38.63      | 32.75      | 31.74      |
|               | $k_1$ (min <sup>-1</sup> )                    | 0.646      | 0.469      | 0.411      | 0.578      | 0.443      | 0.341      |
|               | $R^2$                                         | 0.99682    | 0.99247    | 0.97288    | 0.9978     | 0.99893    | 0.99582    |
| PSO           | $q_{e,calc}$ (mg g <sup>-1</sup> )            | 39.21      | 30.77      | 30.3       | 39.37      | 34.72      | 35.09      |
|               | $k_2$ (g mg <sup>-1</sup> min <sup>-1</sup> ) | 0.0372     | 0.0306     | 0.0121     | 0.0652     | 0.0205     | 0.0106     |
|               | $h$ (mg g <sup>-1</sup> min <sup>-1</sup> )   | 57.14      | 28.98      | 11.16      | 101.01     | 24.75      | 13.07      |
|               | $R^2$                                         | 1          | 0.9999     | 0.9977     | 0.9999     | 0.9998     | 0.9989     |
|               | $q_{e,exp}$ (mg g <sup>-1</sup> )             | 38.93      | 30.34      | 30.03      | 38.99      | 34.45      | 34.56      |
|               | <b>S:L ratio</b>                              | <b>0.5</b> | <b>1</b>   | <b>2</b>   | <b>0.5</b> | <b>1</b>   | <b>2</b>   |
| PFO           | $q_{e,calc}$ (mg g <sup>-1</sup> )            | 33.34      | 29.33      | 19.64      | 39.96      | 32.75      | 20.07      |
|               | $k_1$ (min <sup>-1</sup> )                    | 0.724      | 0.469      | 0.608      | 0.371      | 0.443      | 0.763      |
|               | $R^2$                                         | 0.97402    | 0.99247    | 0.99404    | 0.9884     | 0.98893    | 0.9992     |
| PSO           | $q_{e,calc}$ (mg g <sup>-1</sup> )            | 36.23      | 30.77      | 20.28      | 42.02      | 34.72      | 20.41      |
|               | $k_2$ (g mg <sup>-1</sup> min <sup>-1</sup> ) | 0.0176     | 0.0306     | 0.0774     | 0.0192     | 0.0205     | 0.1312     |
|               | $h$ (mg g <sup>-1</sup> min <sup>-1</sup> )   | 23.15      | 28.98      | 31.85      | 33.90      | 24.75      | 54.64      |
|               | $R^2$                                         | 0.9988     | 0.9999     | 1          | 0.9998     | 0.9998     | 0.9999     |
|               | $q_{e,exp}$ (mg g <sup>-1</sup> )             | 35.31      | 30.34      | 20.13      | 41.29      | 34.45      | 20.33      |
|               | <b>C<sub>0</sub> (mg/L)</b>                   | <b>20</b>  | <b>40</b>  | <b>80</b>  | <b>20</b>  | <b>40</b>  | <b>80</b>  |
| PFO           | $q_{e,calc}$ (mg g <sup>-1</sup> )            | 19.17      | 29.33      | 35.73      | 19.58      | 32.75      | 40.17      |
|               | $k_1$ (min <sup>-1</sup> )                    | 0.499      | 0.469      | 0.399      | 0.486      | 0.443      | 0.431      |
|               | $R^2$                                         | 0.9969     | 0.9925     | 0.9976     | 0.9971     | 0.9889     | 0.9969     |
| PSO           | $q_{e,calc}$ (mg g <sup>-1</sup> )            | 19.72      | 30.77      | 35.71      | 20.37      | 34.72      | 44.84      |
|               | $k_2$ (g mg <sup>-1</sup> min <sup>-1</sup> ) | 0.0747     | 0.0306     | 0.7129     | 0.0455     | 0.0205     | 0.0108     |
|               | $h$ (mg g <sup>-1</sup> min <sup>-1</sup> )   | 29.07      | 28.98      | 909.09     | 18.87      | 24.75      | 21.64      |
|               | $R^2$                                         | 0.9999     | 0.9999     | 0.9995     | 0.9991     | 0.9998     | 0.9991     |
|               | $q_{e,exp}$ (mg g <sup>-1</sup> )             | 19.72      | 30.77      | 35.71      | 20.37      | 34.72      | 44.84      |
|               | <b>T (K)</b>                                  | <b>293</b> | <b>308</b> | <b>323</b> | <b>293</b> | <b>308</b> | <b>323</b> |
| PFO           | $q_{e,calc}$ (mg g <sup>-1</sup> )            | 29.33      | 27.62      | 31.76      | 32.75      | 32.58      | 33.32      |
|               | $k_1$ (min <sup>-1</sup> )                    | 0.469      | 0.369      | 0.269      | 0.443      | 0.365      | 0.431      |
|               | $R^2$                                         | 0.99247    | 0.9880     | 0.93313    | 0.98893    | 0.98921    | 0.99150    |
| PSO           | $q_{e,calc}$ (mg g <sup>-1</sup> )            | 30.77      | 28.57      | 37.88      | 34.72      | 33.90      | 33.90      |
|               | $k_2$ (g mg <sup>-1</sup> min <sup>-1</sup> ) | 0.0306     | 0.0433     | 0.0051     | 0.0205     | 0.0279     | 0.0791     |
|               | $h$ (mg g <sup>-1</sup> min <sup>-1</sup> )   | 28.98      | 35.33      | 7.29       | 24.75      | 32.05      | 90.9       |
|               | $R^2$                                         | 0.9999     | 0.9982     | 0.9926     | 0.9998     | 0.9998     | 0.9992     |
|               | $q_{e,exp}$ (mg g <sup>-1</sup> )             | 30.34      | 27.77      | 36.97      | 34.45      | 33.53      | 33.37      |

**Table S3.** Langmuir parameters for Orange II adsorption onto LDH-R

| <b>T(K)</b> | <b>Model</b>     | <b>q<sub>max</sub>, mg/g</b> | <b>K<sub>L</sub>, L/mg</b> | <b>R<sup>2</sup></b> | <b>χ<sup>2</sup></b> | <b>Δq, %</b> | <b>ARE, %</b> |
|-------------|------------------|------------------------------|----------------------------|----------------------|----------------------|--------------|---------------|
| 293         | Langmuir -type 1 | 37.31                        | 0.628                      | 0.9987               | 4.096                | 18.92        | 15.68         |
| 308         |                  | 40.65                        | 0.305                      | 0.9939               | 5.86                 | 20.07        | 17.85         |
| 323         |                  | 126.58                       | 0.117                      | 0.9982               | 0.86                 | 5.27         | 2.75          |
| 293         | Langmuir -type 2 | 37.17                        | 0.971                      | 0.9816               | 3.13                 | 21.16        | 8.47          |
| 308         |                  | 40.16                        | 0.438                      | 0.9154               | 2.48                 | 14.36        | 11.69         |
| 323         |                  | 107.53                       | 0.173                      | 0.9981               | 5.165                | 10.72        | 9.55          |
| 293         | Langmuir -type 3 | 35.8                         | 1.116                      | 0.9445               | 0.484                | 7.1          | 5.72          |
| 308         |                  | 38.53                        | 0.398                      | 0.9642               | 0.494                | 6.03         | 3.97          |
| 323         |                  | 116.42                       | 0.151                      | 0.9591               | 2.22                 | 8.57         | 5.83          |
| 293         | Langmuir -type 4 | 36.27                        | 1.054                      | 0.9445               | 0.526                | 6.95         | 5.51          |
| 308         |                  | 38.85                        | 0.384                      | 0.9642               | 0.479                | 6.15         | 4.48          |
| 323         |                  | 118.5                        | 0.145                      | 0.9591               | 1.878                | 8.07         | 5.14          |

**Table S4.** Langmuir parameters for Orange II adsorption onto LDH-W

| <b>T(K)</b> | <b>Model</b>     | <b>q<sub>max</sub>, mg/g</b> | <b>K<sub>L</sub>, L/mg</b> | <b>R<sup>2</sup></b> | <b>χ<sup>2</sup></b> | <b>Δq, %</b> | <b>ARE, %</b> |
|-------------|------------------|------------------------------|----------------------------|----------------------|----------------------|--------------|---------------|
| 293         | Langmuir -type 1 | 42.92                        | 0.71                       | 0.999                | 1.646                | 11.14        | 7.95          |
| 308         |                  | 44.25                        | 0.61                       | 0.9987               | 5.415                | 20.42        | 15.5          |
| 323         |                  | 139.73                       | 0.127                      | 0.99                 | 13.184               | 20.53        | 15.36         |
| 293         | Langmuir -type 2 | 45.45                        | 0.728                      | 0.971                | 1.488                | 10.37        | 7.98          |
| 308         |                  | 41.32                        | 1.512                      | 0.9799               | 0.615                | 7.32         | 4.33          |
| 323         |                  | 222.22                       | 0.058                      | 0.9883               | 37.03                | 29.38        | 21.4          |
| 293         | Langmuir -type 3 | 42.08                        | 0.924                      | 0.9201               | 0.645                | 9.44         | 6.28          |
| 308         |                  | 45.58                        | 0.373                      | 0.996                | 0.058                | 1.98         | 1.43          |
| 323         |                  | 132.82                       | 0.236                      | 0.9947               | 0.054                | 1.1          | 0.785         |
| 293         | Langmuir -type 4 | 43.04                        | 0.85                       | 0.9201               | 0.744                | 8.84         | 6.39          |
| 308         |                  | 45.63                        | 0.372                      | 0.996                | 0.059                | 1.98         | 1.38          |
| 323         |                  | 132.98                       | 0.235                      | 0.9947               | 0.054                | 1.1          | 0.78          |

**References**

Cocheci, L., Lupa, L., Gheju, M., Golban, A., Lazău, R. and Pode, R. (2018) Zn–Al–CO<sub>3</sub> layered double hydroxides prepared from a waste of hot-dip galvanizing process. *Clean Technol. Environ. Policy* 20, 1105–1112. doi: 10.1007/s10098-018-1533-3
